# Supplementary material for: An evaluation of genotyping by sequencing (GBS) to map the Breviaristatum-e (ari-e) locus in cultivated barley
Source: PubMed Central journal article supplement (PMC3922333; doi:10.1186/1471-2164-15-104), 2014-02-06
Supplement: 1471-2164-15-104-S3.pdf [file 1471-2164-15-104-S3.pdf]

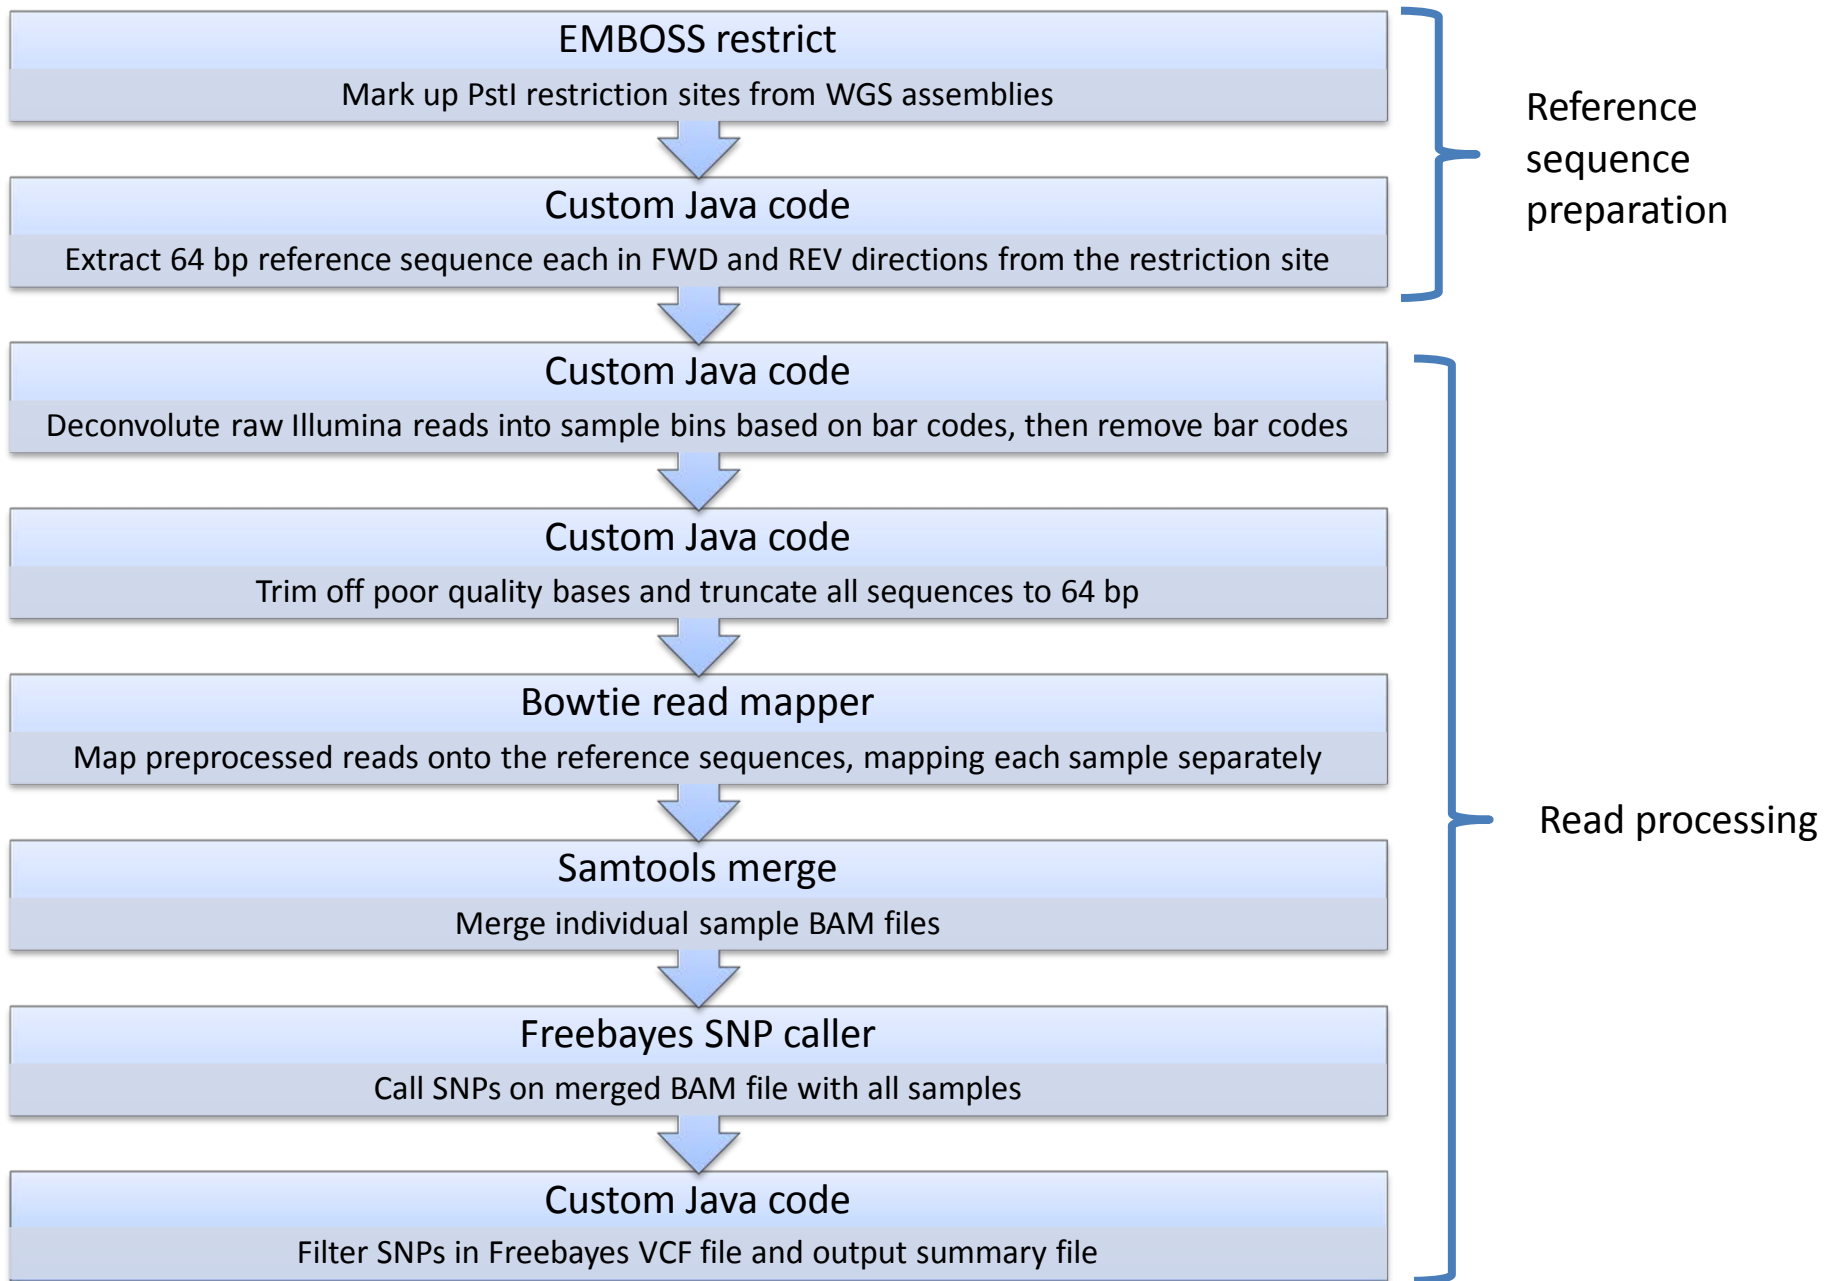

Supplementary Figure 1. Data processing workflow for the raw GBS Illumina reads.
